# Supplementary material
Source: publisher figshare collection journal article supplement (https://rs.figshare.com/ndownloader/files/14513825)
Supplement: Supplementary file 1 [file 14513825]

Relevant information on how the figures of the manuscript can be recreated by the model:

Figures 2 and 3:

The model simulations were carried out in COPASI. The time series data generated in the respective simulations were used in conjunction with the numerical data extracted from Plot Digitizer (for experimental data points), or from their respective papers as discussed in the main text. Plots were prepared in R, or were used as they were available in COPASI. The interval size for collecting data was 0.1min.

Figure 4:

The model simulations were carried out in COPASI. The time series data generated in the respective simulations were used. Plots were generated in prepared in R, or were used as they were available in COPASI. The interval size for collecting data was 0.1min.
